# Supplementary material
Source: PubMed Central journal article supplement (PMC10711658)
Supplement: EMBJ-42-e114889-s005.pdf [file EMBJ-42-e114889-s005.pdf]

# Structure and mechanism of a eukaryotic ceramide synthase complex

Xin Gong, Tian Xie, Qi Fang, Zike Zhang, Yanfei Wang, and Feitong Dong  
DOI: 10.15252/emboj.2023114889

Corresponding author(s): Xin Gong ([gongx@sustech.edu.cn](mailto:gongx@sustech.edu.cn))

---

## Review Timeline:

|                     |             |
|---------------------|-------------|
| Submission Date:    | 29th Jun 23 |
| Editorial Decision: | 17th Aug 23 |
| Revision Received:  | 6th Sep 23  |
| Editorial Decision: | 20th Oct 23 |
| Revision Received:  | 20th Oct 23 |
| Accepted:           | 24th Oct 23 |

---

Editor: William Teale

## Transaction Report:

(Note: With the exception of the correction of typographical or spelling errors that could be a source of ambiguity, letters and reports are not edited. Depending on transfer agreements, referee reports obtained elsewhere may or may not be included in this compilation. Referee reports are anonymous unless the Referee chooses to sign their reports.)

Dear Dr. Gong,

Thank you again for the submission of your manuscript entitled "Structure and mechanism of a eukaryotic ceramide synthase complex" (EMBOJ-2023-114889) and for your patience during the review process. We have now received the reports from the referees, which I copy below.

As you can see from their comments, while all referees are generally supportive of publication in The EMBO Journal, all highlight some points for clarification and discussion that will require your attention before your manuscript can be published in The EMBO Journal.

Based on the overall interest expressed in the reports, I would like to invite you to address the comments of all referees in a revised version of the manuscript. I should add that it is The EMBO Journal policy to allow only a single major round of revision and that it is therefore important to resolve the main concerns at this stage. I believe the concerns of the referees are reasonable and addressable, but please contact me if you have any questions, need further input on the referee comments or if you anticipate any problems in addressing any of their points. Please, follow the instructions below when preparing your manuscript for resubmission.

I would also like to point out that as a matter of policy, competing manuscripts published during this period will not be taken into consideration in our assessment of the novelty presented by your study ("scooping" protection). We have extended this 'scooping protection policy' beyond the usual 3 month revision timeline to cover the period required for a full revision to address the essential experimental issues. Please contact me if you see a paper with related content published elsewhere to discuss the appropriate course of action.

When preparing your letter of response to the referees' comments, please bear in mind that this will form part of the Review Process File, and will therefore be available online to the community. For more details on our Transparent Editorial Process, please visit our website: <https://www.embopress.org/page/journal/14602075/authorguide#transparentprocess>

Again, please contact me at any time during revision if you need any help or have further questions.

Thank you very much again for the opportunity to consider your work for publication. I look forward to your revision.

Best regards,

William

-----  
William Teale, Ph.D.  
Editor  
The EMBO Journal

When submitting your revised manuscript, please carefully review the instructions below and include the following items:

- 1) a .docx formatted version of the manuscript text (including legends for main figures, EV figures and tables). Please make sure that the changes are highlighted to be clearly visible.
- 2) individual production quality figure files as .eps, .tif, .jpg (one file per figure).
- 3) a .docx formatted letter INCLUDING the reviewers' reports and your detailed point-by-point response to their comments. As part of the EMBO Press transparent editorial process, the point-by-point response is part of the Review Process File (RPF), which will be published alongside your paper.
- 4) a complete author checklist, which you can download from our author guidelines ([https://wol-prod-cdn.literatumonline.com/pb-assets/embo-site/Author Checklist%20-%20EMBO%20J-1561436015657.xlsx](https://wol-prod-cdn.literatumonline.com/pb-assets/embo-site/Author%20Checklist%20-%20EMBO%20J-1561436015657.xlsx)). Please insert information in the checklist that is also reflected in the manuscript. The completed author checklist will also be part of the RPF.
- 5) Please note that all corresponding authors are required to supply an ORCID ID for their name upon submission of a revised manuscript.
- 6) We require a 'Data Availability' section after the Materials and Methods. Before submitting your revision, primary datasets produced in this study need to be deposited in an appropriate public database, and the accession numbers and database listed under 'Data Availability'. Please remember to provide a reviewer password if the datasets are not yet public (see

<https://www.embopress.org/page/journal/14602075/authorguide#datadeposition>). If no data deposition in external databases is needed for this paper, please then state in this section: This study includes no data deposited in external repositories. Note that the Data Availability Section is restricted to new primary data that are part of this study.

Note - All links should resolve to a page where the data can be accessed.

7) When assembling figures, please refer to our figure preparation guideline in order to ensure proper formatting and readability in print as well as on screen:

<http://bit.ly/EMBOPressFigurePreparationGuideline>

Please remember: Digital image enhancement is acceptable practice, as long as it accurately represents the original data and conforms to community standards. If a figure has been subjected to significant electronic manipulation, this must be noted in the figure legend or in the 'Materials and Methods' section. The editors reserve the right to request original versions of figures and the original images that were used to assemble the figure.

8) For data quantification: please specify the name of the statistical test used to generate error bars and P values, the number (n) of independent experiments (specify technical or biological replicates) underlying each data point and the test used to calculate p-values in each figure legend. The figure legends should contain a basic description of n, P and the test applied. Graphs must include a description of the bars and the error bars (s.d., s.e.m.).

9) We would also encourage you to include the source data for figure panels that show essential data. Numerical data can be provided as individual .xls or .csv files (including a tab describing the data). For 'blots' or microscopy, uncropped images should be submitted (using a zip archive or a single pdf per main figure if multiple images need to be supplied for one panel). Additional information on source data and instruction on how to label the files are available at .

10) We replaced Supplementary Information with Expanded View (EV) Figures and Tables that are collapsible/expandable online (see examples in <https://www.embopress.org/doi/10.15252/embj.201695874>). A maximum of 5 EV Figures can be typeset. EV Figures should be cited as 'Figure EV1, Figure EV2" etc. in the text and their respective legends should be included in the main text after the legends of regular figures.

- For the figures that you do NOT wish to display as Expanded View figures, they should be bundled together with their legends in a single PDF file called \*Appendix\*, which should start with a short Table of Content. Appendix figures should be referred to in the main text as: "Appendix Figure S1, Appendix Figure S2" etc. See detailed instructions regarding expanded view here: .

- Additional Tables/Datasets should be labelled and referred to as Table EV1, Dataset EV1, etc. Legends have to be provided in a separate tab in case of .xls files. Alternatively, the legend can be supplied as a separate text file (README) and zipped together with the Table/Dataset file.

11) At EMBO Press we ask authors to provide source data for the main manuscript figures. Our source data coordinator will contact you to discuss which figure panels we would need source data for and will also provide you with helpful tips on how to upload and organize the files.

12) Our journal encourages inclusion of \*data citations in the reference list\* to directly cite datasets that were re-used and obtained from public databases. Data citations in the article text are distinct from normal bibliographical citations and should directly link to the database records from which the data can be accessed. In the main text, data citations are formatted as follows: "Data ref: Smith et al, 2001" or "Data ref: NCBI Sequence Read Archive PRJNA342805, 2017". In the Reference list, data citations must be labeled with "[DATASET]". A data reference must provide the database name, accession number/identifiers and a resolvable link to the landing page from which the data can be accessed at the end of the reference. Further instructions are available at .

Further instructions for preparing your revised manuscript:

Please make sure you upload a letter of response to the referees' comments together with the revised manuscript.

Please also check that the title and abstract of the manuscript are brief, yet explicit, even to non-specialists.

When assembling figures, please refer to our figure preparation guideline in order to ensure proper formatting and readability in print as well as on screen:

<https://bit.ly/EMBOPressFigurePreparationGuideline>

See also guidelines for figure legends: <https://www.embopress.org/page/journal/14602075/authorguide#figureformat>

At EMBO Press we ask authors to provide source data for the main manuscript figures. Our source data coordinator will contact you to discuss which figure panels we would need source data for and will also provide you with helpful tips on how to upload

and organize the files.

**IMPORTANT:** When you send the revision we will require

- a point-by-point response to the referees' comments, with a detailed description of the changes made (as a word file).
- a word file of the manuscript text.
- individual production quality figure files (one file per figure)
- a complete author checklist, which you can download from our author guidelines (<https://www.embopress.org/page/journal/14602075/authorguide>).
- Expanded View files (replacing Supplementary Information)

Please see out instructions to authors

<https://www.embopress.org/page/journal/14602075/authorguide#expandedview>

Please remember: Digital image enhancement is acceptable practice, as long as it accurately represents the original data and conforms to community standards. If a figure has been subjected to significant electronic manipulation, this must be noted in the figure legend or in the 'Materials and Methods' section. The editors reserve the right to request original versions of figures and the original images that were used to assemble the figure.

Further information is available in our Guide For Authors: <https://www.embopress.org/page/journal/14602075/authorguide>

We realize that it is difficult to revise to a specific deadline. In the interest of protecting the conceptual advance provided by the work, we recommend a revision within 3 months (15th Nov 2023). Please discuss the revision progress ahead of this time with the editor if you require more time to complete the revisions. Use the link below to submit your revision:

<https://emboj.msubmit.net/cgi-bin/main.plex>

-----  
Referee #1:

The manuscript by Tian Xie et al reports the cryo-EM structures of yeast Ceramide synthase (CerS) in complex with substrate C26-CoA. This work reveals yeast CerS holoenzyme as a dimer of Lac1-Lip1. It also importantly shows the detailed binding mode of the substrate C26-CoA as well as a potential lateral entrance for the sphingoid base. These together with biochemical analysis provide key insights into the ceramide formation reaction catalyzed by eukaryotic CerS. This work is a very nice study presenting important progress in the field. I would only suggest a few points that may need to be addressed.

Major:

1. Line 211-216: Lip1 F40 appears also involved with the interaction of Lac1 (Fig. 4b). The explanation of the effects of Lip1 F40 mutations should be careful as the effects may be indirect.
2. The authors solved the structure of Lac1-Lip1S74F and interestingly observed the collapse of the C26 acyl chain binding tunnel. From Fig. 4g, several residues lining the binding tunnel yet distant from S74F (e.g. W371, K293) show apparent conformational changes. The reason is worth investigation and discussion.
3. Line 350-353: about the catalytic model proposed, can the authors tell from the structure which is the more likely general base (D283 or D286) and which is the coordinating residue (H255 or H256)?
4. Fig 5b-d, the lipid-like density was shown multiple times, which appear redundant. Moreover, modeling a lipid there may help visualization and discussion.
5. Line 286-326, the section "Implications for mammalian CerS" should be shortened and moved to "Discussion" part since the analysis here is only based on predicted human CerS structures. For the same reason, I would suggest moving Fig 6 to supplementary figures.

Minor points:

1. Page 5 line 88-89, the authors should cite the literature here about the assay method they refer to. "develop" appears not accurate and the authors should tone it down.
2. Purified Lac1 or Lag1 shows two bands on SDS-PAGE analysis (Extended Data Fig. 2 a). What is reason for that?
3. Line 147-152: from gel filtration result (Extended Fig. 5e), it appears that the R78A/Y81A/Y125A/Y148A mutant doesn't apparently change the oligomer state so the conclusion on line 151 seems not that solid.

Referee #2:

Ceramides play a critical role in lipid biosynthesis and serve as important signaling molecules. Ceramide synthases, which catalyze ceramide formation, are potential drug targets for treating cancers and metabolic disorders. In this manuscript, the

authors determined the first structure of the yeast ceramide synthase Lac1-Lip1 complex with a C26-CoA substrate. The structure reveals the dimeric architecture of Lac1-Lip1, the catalytic reaction center, fatty acyl-CoA binding site, and a potential sphingoid base entry site. Based on the structure, and in combination with mutagenesis and functional studies, the authors proposed a plausible working mechanism for ceramide synthase. This work offers significant insights into the mechanism of ceramide synthase and lays the groundwork for the rational design of modulators. Overall, the data are of high quality, the findings are novel, and this work will produce a high impact in the field.

Several comments:

1. The activity reported in this study (fig.1b, c) seems considerably lower than those previously published (reference 28), exhibiting at least a hundred-fold difference. In addition, the sigmoidal curve shown in Fig 1b was not observed in the previous published work either. Just wondering whether the assay conditions could cause the difference?

2. It would be helpful to clarify the molecular basis of substrate preference.

In line 195, the authors wrote, "allowing the tunnel to perfectly accommodate a 26-carbon acyl chain." Based on Fig 3, it is unclear whether the acyl chain tunnel opens to the lumen. Considering that human homologues have varied substrate preferences, do they all share the same tunnel to coordinate different substrate lengths?

In fig. 3d, the authors present data up to C26, which displays the highest activity. Can the tunnel accommodate substrates longer than C26, and how would their activities compare? (In mammals, some ceramides have chains longer than C26)

3. The authors discovered an intriguing mutation, S74F, which causes the collapse of the fatty acyl-CoA C26 binding site and subsequently abolishes its function. Can the mutant protein accommodate a shorter substrate? It would be helpful to assess whether this mutant (or any other mutants in this region, such as F51, H52) affects the substrate selectivity as it interacts with the TM7/8 loop, which plays a critical role in substrate selectivity in human homologs.

Minor points

1. The authors attempted to disrupt the dimer interface of Lip1; however, the peak of the mutant protein remains at a similar position as the WT (Extended Data Fig.5b). Is there any evidence of the monomer formation for the mutant?

2. In ED figure 2, it might be useful to compare the peak positions of Lac1 and Lac1-Lip1.

3. In ED figure 6, please specify in the figure legend whether the peak fractions or a normalized, similar amount of protein was loaded on SDS-PAGE.

Referee #3:

Xie et al investigated the structure and catalytic mechanism of the yeast ceramide synthase enzyme, which is composed of two proteins, Lac1 and Lip1. Their study provides empirical structural information regarding the structural basis of the catalytic activities of yeast ceramide synthase. Cryo-Electron microscopy was used to elucidate the structure of Lac1-Lip1 at 3.09 Å, demonstrating that Lac1-Lip1 holoenzyme is a dimer of Lac1-Lip1 heterodimers in the membrane. A hydrophobic tunnel is apparent where the charged fatty acid is bound, exposing the acyl-CoA moiety toward the cytosolic leaflet. The resolved structure shows that the end of the hydrophobic cavity in Lac1 faces the Lip1 transmembrane domain (TM), and mutations in residues in the Lac1 cavity, or the Lip1 TM at the end of the cavity are also critical for catalytic activity. A lateral opening in Lac1 within the bilayer containing a lipid-like density is suggested to direct the sphingoid base substrate into the catalytic site. Finally, the authors compared their Lac1-Lip1 structures with the predicted structure (alpha-fold) of mammalian ceramide synthase 5, which is comprised by just one polypeptide. The comparison suggests that the yeast and mammalian enzymes are structurally similar, despite the yeast enzyme being composed of two polypeptides. Overall, we found this to be an excellent and interesting structural study of a eukaryotic ceramide synthase.

Comments:

The structural insights of membrane-embedded enzymes regarding the entry of substrates, exit of products, and the effects of heterogeneous membrane environments are areas of intense interest. Predicted biochemical mechanisms of CerS were based largely on amino acid sequence motifs and this study provides empirical structural information on tertiary structures of Lac1-Lip1-Acyl-CoA and possible substrate entry mechanisms. We have two minor comments that the authors should consider addressing.

1. In Figure 5 c and d, the authors suggest that the lipid-like structures identify the sphingoid base substrate in the catalytic site. Can the authors provide further insight into how the chemical environment of the active site with the sphingoid base is established? For example, how are the hydrophilic amine and hydroxyl groups inserted deep into the hydrophobic membrane bilayer?

2. In Figure 6, the authors used the predicted structure of CerS5 (alpha-fold), which prefers a shorter chain length of acyl-CoA than C20. The importance of TM7/8 of Lac1 for interacting Lip1 may be more meaningful in other CerS enzymes such as mammalian CerS2 which prefers C24 acyl-CoA. Have the authors made this comparison (ie, with the predicted structure of CerS2 and are the results worth discussing?

3. Please provide evidence/reference to demonstrate that the interaction of TM of Lip1 and TM 2/4/5 of Lac1 is significant to stabilize the specific heterodimer.

**Response to reviewers' comments:****Referee #1:**

*The manuscript by Tian Xie et al reports the cryo-EM structures of yeast Ceramide synthase (CerS) in complex with substrate C26-CoA. This work reveals yeast CerS holoenzyme as a dimer of Lac1-Lip1. It also importantly shows the detailed binding mode of the substrate C26-CoA as well as a potential lateral entrance for the sphingoid base. These together with biochemical analysis provide key insights into the ceramide formation reaction catalyzed by eukaryotic CerS. This work is a very nice study presenting important progress in the field. I would only suggest a few points that may need to be addressed.*

We thank this reviewer for his/her appreciation of our work. We've revised the manuscript based on the suggestions raised by this reviewer to improve the quality of the study.

*Major:*

*1. Line 211-216: Lip1 F40 appears also involved with the interaction of Lac1 (Fig. 4b). The explanation of the effects of Lip1 F40 mutations should be careful as the effects may be indirect.*

We thank this reviewer for the insightful suggestion. The original statement has been revised as "Data on these two Lip1 mutants suggest that Lip1 can enhance the catalytic activity of the complex probably by engaging in Lac1 interaction and acyl chain binding ..." in the revised manuscript.

*2. The authors solved the structure of Lac1-Lip1S74F and interestingly observed the collapse of the C26 acyl chain binding tunnel. From Fig. 4g, several residues lining the binding tunnel yet distant from S74F (e.g. W371, K293) show apparent conformational changes. The reason is worth investigation and discussion.*

We thank this reviewer for the constructive comment. This might be explained as that the mutation of Lip1<sup>S74F</sup> initiated the direct conformation change of the Lac1 TM7/8 loop, thus leading to the subtle perturbation of the overall structure of Lac1 and causing the local conformational changes for the side chains of the residues lining the binding tunnel yet distant from Lip1<sup>S74F</sup> (e.g. W371, K293, etc.). The corresponding discussion has been added in the revised manuscript in lines 286-289.

*3. Line 350-353: about the catalytic model proposed, can the authors tell from the structure which is the more likely general base (D283 or D286) and which is the coordinating residue (H255 or H256)?*

We thank this reviewer for the insightful comment. Due to the absence of structures representing distinct catalytic states, such as those in complex with a sphingoid base substrate, it remains challenging to determine the specific aspartate residue that serves as the general base as well as the specific histidine residue that functions as the coordinating residue. It is even plausible that both aspartate residues and both histidine residues cooperate in the catalytic process. Further studies are needed to elucidate the precise catalytic mechanism of ceramide synthase.

*4. Fig 5b-d, the lipid-like density was shown multiple times, which appear redundant. Moreover, modeling a lipid there may help visualization and discussion.*

Point taken. The original Fig 5 was simplified and revised as suggested by this reviewer.

*5. Line 286-326, the section "Implications for mammalian CerS" should be shortened and moved to "Discussion" part since the analysis here is only based on predicted human CerS structures. For the same reason, I would suggest moving Fig 6 to supplementary figures.*

Point taken. The original Fig. 6 was moved to the supplementary materials. The section "Implications for mammalian CerS" was shortened and moved to the Discussion section.

*Minor points:*

*1. Page 5 line 88-89, the authors should cite the literature here about the assay method they refer to. "develop" appears not accurate and the authors should tone it down.*

Point taken. In the revised manuscript, we have cited the relevant literature about the assay method, and we have replaced the phrase "develop" with "employ".

*2. Purified Lac1 or Lag1 shows two bands on SDS-PAGE analysis (Extended Data Fig. 2 a). What is reason for that?*

We thank this reviewer for the insightful question. We have conducted an investigation using a Lac1 construct with a deletion of the N-terminal 40 residues, and found that this Lac1- $\Delta$ N40 construct migrated as a single band at a position similar to the lower band observed for the WT Lac1 (Figure shown below, panel A). This suggests that the lower band of purified WT Lac1 protein may be attributed to degradation originating from the N-terminal region of Lac1 protein. Consistent with this, the N-terminal 70 residues of Lac1 were not resolved in the EM map, indicating the high flexibility of this region. Additionally,

we observed that the Lac1<sup>ΔN40</sup>-Lip1 complex exhibited similar enzymatic activity compared to the WT Lac1-Lip1 complex (Figure shown below, panel B). Since the N-terminal degradation/truncation of Lac1 did not affect the conclusions of the original manuscript, we did not include this analysis in the manuscript.

We thank this reviewer for the constructive comment. And we are sorry for the overinterpretation of the results for the R78A/Y81A/Y125A/Y148A mutant in the original manuscript. The corresponding content was modified to as “*Although the mutated complex remained partially as dimer in SEC, this mutant displayed prominently reduced expression level, relatively poor solution behavior with broad SEC peak, and approximately 5% of the enzymatic activity of the WT complex (Fig EV3E, F). The data implies that the Lip1 homo-dimerization interface might also be important for the proper folding and enzymatic activity of the complex.*” in the revised manuscript to avoid overinterpretation.

We thank the reviewer for his/her time and constructive comments.

## **Referee #2:**

*Ceramides play a critical role in lipid biosynthesis and serve as important signaling molecules. Ceramide synthases, which catalyze ceramide formation, are potential drug targets for treating cancers and metabolic disorders. In this manuscript, the authors determined the first structure of the yeast ceramide synthase Lac1-Lip1 complex with a C26-CoA substrate. The structure reveals the dimeric architecture of Lac1-Lip1, the catalytic reaction center, fatty acyl-CoA binding site, and a potential sphingoid base entry site. Based on the structure, and in combination with mutagenesis and functional studies, the authors proposed a plausible working mechanism for ceramide synthase. This work offers significant insights into the mechanism of ceramide synthase and lays the groundwork for the rational design of modulators. Overall, the data are of high quality, the findings are novel, and this work will produce a high impact in the field.*

*Several comments:*

*1. The activity reported in this study (fig.1b, c) seems considerably lower than those previously published (reference 28), exhibiting at least a hundred-fold difference. In addition, the sigmoidal curve shown in Fig 1b was not observed in the previous published work either. Just wondering whether the assay conditions could cause the difference?*



We appreciate the insightful comment from the reviewer. The Lac1-Lip1 complex protein from ref28 exhibited over a hundred-fold higher activity compared to our purified Lac1-Lip1 complex. Additionally, the Triton X-100 purified Lac1-Lip1 complex from ref28 displayed reasonable ceramide synthase activity despite no visible Lip1 on the protein gel. However, in our study, we observed that the Lac1 protein alone had no activity. Furthermore, the sigmoidal curve observed in Figure 1C of our study was not observed in ref28. We suspect that the differences in CerS activity between our study and ref28 may be attributed to several factors, including variations in the fusion of affinity tags to different regions of the Lac1 protein, differences in protein expression systems, usage of detergents during protein purification, variations in protein quantification methods, and differences in assay systems. Further investigation is necessary to thoroughly explore and clarify the discrepancies between our current study and ref28.

*2. It would be helpful to clarify the molecular basis of substrate preference.*

*In line 195, the authors wrote, "allowing the tunnel to perfectly accommodate a 26-carbon acyl chain." Based on Fig 3, it is unclear whether the acyl chain tunnel opens to the lumen. Considering that human homologues have varied substrate preferences, do they all share the same tunnel to coordinate different substrate lengths?*

*In fig. 3d, the authors present data up to C26, which displays the highest activity. Can the tunnel accommodate substrates longer than C26, and how would their activities compare? (In mammals, some ceramides have chains longer than C26)*

We thank this reviewer for the critical comments. As suggested by this reviewer, the original Fig. 3A was modified to show that the acyl-chain binding tunnel opens to the ER lumen.

Since both the hydrophilic reaction chamber (Fig. 2C) and the upper portion of the acyl-chain binding tunnel (Fig. 3E) exhibit high conservation among yeast and human CerS homologs, it is likely that human CerS homologs utilize the same reaction chamber and tunnel as the Lac1-Lip1 complex to coordinate acyl-CoA substrates. However, the residues lining the lower portion of the acyl chain binding tunnel are not conserved in yeast and human CerS homologs (Fig. 3E). This observation leads us to suspect that this variable region of human CerS homologs might play a role in accommodating acyl-CoA substrates of different lengths. To fully understand the mechanism of substrate selectivity for human CerS homologs, further structural and biochemical studies are required.

The close proximity of the distal C26 atom of the C26 acyl chain to the side chains of surrounding hydrophobic residues (such as L341, F343, and I352 of Lac1, and F40 of Lip1) suggests that the tunnel may not have sufficient space to accommodate substrates longer than C26 (Fig. 3C). Furthermore, it is worth noting that *S. cerevisiae* predominantly produces C26 ceramides and does not naturally synthesize longer chain ( $\geq$ C28) ceramides. Therefore, we suspect that the CerS activity of the Lac1-Lip1 complex with longer acyl-CoA substrates, such as C28-CoA, might be significantly lower compared to its activity with C26-CoA substrate.

3. The authors discovered an intriguing mutation, S74F, which causes the collapse of the fatty acyl-CoA C26 binding site and subsequently abolishes its function. Can the mutant protein accommodate a shorter substrate? It would be helpful to assess whether this mutant (or any other mutants in this region, such as F51, H52) affects the substrate selectivity as it interacts with the TM7/8 loop, which plays a critical role in substrate selectivity in human homologs.

We appreciate the valuable comment from the reviewer. As recommended, we have examined the enzymatic activity of the F51A, F51R, H52A, and S74F mutants using C14- to C26-CoA substrates (as described in lines 267-271 of the revised manuscript). Our data showed that the F51A mutant displayed similar acyl-CoA substrate selectivity as the WT complex, and the other three mutants were essentially inactive with all the acyl-CoA substrates tested (see Appendix Fig S4C in the revised manuscript).

*Minor points*

1. The authors attempted to disrupt the dimer interface of Lip1; however, the peak of the mutant protein remains at a similar position as the WT (Extended Data Fig.5b). Is there any evidence of the monomer formation for the mutant?

We thank this reviewer for the constructive comment. And we are sorry for the overinterpretation of the results for the R78A/Y81A/Y125A/Y148A mutant in the original manuscript. The corresponding content was modified to as “Although the mutated complex remained partially as dimer in SEC, this mutant displayed prominently reduced expression level, relatively poor solution behavior with broad SEC peak, and approximately 5% of the enzymatic activity of the WT complex (Fig EV3E, F). The data implies that the Lip1 homo-dimerization interface might also be important for the proper folding and enzymatic activity of the complex.” in the revised manuscript to avoid overinterpretation.

2. In ED figure 2, it might be useful to compare the peak positions of Lac1 and Lac1-Lip1.

Point taken. The figure has been revised in accordance with the suggestion made by this reviewer in the revised manuscript.

3. In ED figure 6, please specify in the figure legend whether the peak fractions or a normalized, similar amount of protein was loaded on SDS-PAGE.

Point taken. The figure legend was revised as “Similar amounts of purified proteins were subjected to SDS-PAGE gels for analysis.” in the revised manuscript.

We thank the reviewer for his/her time and constructive comments.

### **Referee #3:**

*Xie et al investigated the structure and catalytic mechanism of the yeast ceramide synthase enzyme, which is composed of two proteins, Lac1 and Lip1. Their study provides empirical structural information regarding the structural basis of the catalytic activities of yeast ceramide synthase. Cryo-Electron microscopy was used to elucidate the structure of Lac1-Lip1 at 3.09 Å, demonstrating that Lac1-Lip1 holoenzyme is a dimer of Lac1-Lip1 heterodimers in the membrane. A hydrophobic tunnel is apparent where the charged fatty acid is bound, exposing the acyl-CoA moiety toward the cytosolic leaflet. The resolved structure shows that the end of the hydrophobic cavity in Lac1 faces the Lip1 transmembrane domain (TM), and mutations in residues in the Lac1 cavity, or the Lip1 TM at the end of the cavity are also critical for catalytic activity. A lateral opening in Lac1 within the bilayer containing a lipid-like density is suggested to direct the sphingoid base substrate into the catalytic site. Finally, the authors compared their Lac1-Lip1 structures with the predicted structure (alpha-fold) of mammalian ceramide synthase 5, which is comprised by just one polypeptide. The comparison suggests that the yeast and mammalian enzymes are structurally similar, despite the yeast enzyme being composed of two polypeptides. Overall, we found this to be an excellent and interesting structural study of a eukaryotic ceramide synthase.*

#### *Comments:*

*The structural insights of membrane-embedded enzymes regarding the entry of substrates, exit of products, and the effects of heterogenous membrane environments are areas of intense interest. Predicted biochemical mechanisms of CerS were based largely on amino acid sequence motifs and this study provides empirical structural information on tertiary structures of Lac1-Lip1-Acyl-CoA and possible substrate entry mechanisms. We have two minor comments that the authors should consider addressing.*

*1. In Figure 5 c and d, the authors suggest that the lipid-like structures identify the sphingoid base substrate in the catalytic site. Can the authors provide further insight into how the chemical environment of the active site with the sphingoid base is established? For example, how are the hydrophilic amine and hydroxyl groups inserted deep into the hydrophobic membrane bilayer?*

We thank this reviewer for the constructive comment. The sphingoid base substrates are amphipathic molecules with hydrophilic amine and hydroxyl groups and hydrophobic aliphatic chains. The surface of transmembrane region of the Lac1-Lip1 complex embedded in membrane bilayer remain largely hydrophobic, ensuring the tethering of sphingoid base substrate to the Lac1-Lip1 complex. Meanwhile, the polar residues Ser186 and Gln227, located close to the entrance of the lateral opening, might provide a relative hydrophilic environment to help orientate and coordinate the hydrophilic amine and hydroxyl groups of sphingoid base. Altogether, the predominantly hydrophobic property of the transmembrane region and the hydrophilic feature near the lateral opening on Lac1 provide a suitable environment to coordinate a sphingoid base substrate.

*2. In Figure 6, the authors used the predicted structure of CerS5 (alpha-fold), which prefers a shorter chain length of acyl-CoA than C20. The importance of TM7/8 of Lac1 for interacting Lip1 may be more meaningful in other CerS enzymes such as mammalian CerS2 which prefers C24 acyl-CoA. Have the authors made this comparison (ie, with the predicted structure of CerS2 and are the results worth discussing?)*

We thank this reviewer for the insightful comment. As suggested by this reviewer, we've superimposed the predicted human CerS2 model (hCerS2<sup>AF</sup>) with the Lac1-Lip1 structure (Figure shown below, panel A), and also the hCerS2<sup>AF</sup> with the hCerS5<sup>AF</sup> (Figure shown below, panel B). Although CerS2 prefers C24-CoA and CerS5 prefers C16-CoA, hCerS2<sup>AF</sup> and hCerS5<sup>AF</sup> share similar structural features in the TM6/7 loop and the N-terminal region. The precise mechanism of acyl-CoA selectivity in human CerS homologs would need to be explored in the future.

We thank this reviewer for the constructive comment. As suggested by this reviewer, we created two Lip1 mutants at the TM interaction interface, namely Lip1<sup>V37F/K41F</sup> and Lip1<sup>V37Y/K41Y</sup>. Our results indicated that both mutants partially impaired the formation of the complex between Lac1 and Lip1, providing evidence for the importance of the TM interaction interface in the formation of the Lac1-Lip1 complex (see lines 248-252 and Appendix Fig S4A in the revised manuscript).

We thank the reviewer for his/her time and constructive comments.

Dear Xin,

Thank you submitting a revised version of your manuscript. It was sent to the same three reviewers that originally appraised your work; their comments are attached to the bottom of this email. As you will see, all three referees are satisfied with the changes you made. Before we can move forwards towards publication of your manuscript, though, there are some remaining editorial points which need to be addressed. In this regard, would you please:

- choose only five keywords,
- limit the listed authors to ten for each reference (+ et al. where necessary), and
- ensure datasets EMD-35862, EMD-35863 and 8IZD; 8IZF are not referred to in the data availability statement, and made publicly available.

I look forward to receiving these changes. EMBO Press is an editorially independent publishing platform for the development of EMBO scientific publications.

Best wishes,

William

William Teale, PhD  
Editor  
The EMBO Journal  
w.teale@embojournal.org

Instructions for preparing your revised manuscript:

Please check that the title and abstract of the manuscript are brief, yet explicit, even to non-specialists.

When assembling figures, please refer to our figure preparation guideline in order to ensure proper formatting and readability in print as well as on screen:

<https://bit.ly/EMBOPressFigurePreparationGuideline>

See also figure legend guidelines: <https://www.embopress.org/page/journal/14602075/authorguide#figureformat>

**IMPORTANT:** When you send the revision we will require

- a point-by-point response to the referees' comments, with a detailed description of the changes made (as a word file).
- a word file of the manuscript text.

- individual production quality figure files (one file per figure)

- a complete author checklist, which you can download from our author guidelines

(<https://www.embopress.org/page/journal/14602075/authorguide>).

- Expanded View files (replacing Supplementary Information)

Please see out instructions to authors

<https://www.embopress.org/page/journal/14602075/authorguide#expandedview>

Please remember: Digital image enhancement is acceptable practice, as long as it accurately represents the original data and conforms to community standards. If a figure has been subjected to significant electronic manipulation, this must be noted in the figure legend or in the 'Materials and Methods' section. The editors reserve the right to request original versions of figures and the original images that were used to assemble the figure.

Further information is available in our Guide For Authors: <https://www.embopress.org/page/journal/14602075/authorguide>

We realize that it is difficult to revise to a specific deadline. In the interest of protecting the conceptual advance provided by the work, we recommend a revision within 3 months (18th Jan 2024). Please discuss the revision progress ahead of this time with the editor if you require more time to complete the revisions. Use the link below to submit your revision:

<https://emboj.msubmit.net/cgi-bin/main.plex>

-----  
Referee #1:

All my questions have been adequately addressed. I would recommend publication.

Referee #2:

The authors have adequately addressed my comments.

Referee #3:

The authors have adequately addressed my concerns.

All editorial and formatting issues were resolved by the authors.

Dear Xin,

I am pleased to inform you that your manuscript has been accepted for publication in the EMBO Journal.

Congratulations on a study that I am sure will be really well-appreciated!

-----

Please note that it is EMBO Journal policy for the transcript of the editorial process (containing referee reports and your response letter) to be published as an online supplement to each paper. If you do NOT want this, you will need to inform the Editorial Office via email immediately. More information is available here:  
<https://www.embopress.org/page/journal/14602075/authorguide#transparentprocess>

Your manuscript will be processed for publication in the journal by EMBO Press. Manuscripts in the PDF and electronic editions of The EMBO Journal will be copy edited, and you will be provided with page proofs prior to publication. Please note that supplementary information is not included in the proofs.

You will be contacted by Wiley Author Services to complete licensing and payment information. The required 'Page Charges Authorization Form' is available here: [https://www.embopress.org/pb-assets/embo-site/tej\\_apc.pdf](https://www.embopress.org/pb-assets/embo-site/tej_apc.pdf) - please download and complete the form and return to [embopressproduction@wiley.com](mailto:embopressproduction@wiley.com)

EMBO Press participates in many Publish and Read agreements that allow authors to publish Open Access with reduced/no publication charges. Check your eligibility: <https://authorservices.wiley.com/author-resources/Journal-Authors/open-access/affiliation-policies-payments/index.html>

Should you be planning a Press Release on your article, please get in contact with [embojournal@wiley.com](mailto:embojournal@wiley.com) as early as possible, in order to coordinate publication and release dates.

If you have any questions, please do not hesitate to call or email the Editorial Office. Thank you for your contribution to The EMBO Journal.

Yours sincerely,

William

William Teale, PhD  
Editor  
The EMBO Journal  
[w.teale@embojournal.org](mailto:w.teale@embojournal.org)

\*\* Click here to be directed to your login page: <https://emboj.msubmit.net>



## EMBO Press Author Checklist

|                                      |
|--------------------------------------|
| Corresponding Author Name: Xin Gong  |
| Journal Submitted to: EMBO Journal   |
| Manuscript Number: EMBOJ-2023-114889 |

### USEFUL LINKS FOR COMPLETING THIS FORM

[The EMBO Journal - Author Guidelines](#)  
[EMBO Reports - Author Guidelines](#)  
[Molecular Systems Biology - Author Guidelines](#)  
[EMBO Molecular Medicine - Author Guidelines](#)

### Reporting Checklist for Life Science Articles (updated January)

This checklist is adapted from Materials Design Analysis Reporting (MDAR) Checklist for Authors. MDAR establishes a minimum set of requirements in transparent reporting in the life sciences (see Statement of Task: [10.31222/osf.io/9sm4x](https://doi.org/10.31222/osf.io/9sm4x)). Please follow the journal's guidelines in preparing your manuscript. **Please note that a copy of this checklist will be published alongside your article.**

### Abridged guidelines for figures

#### 1. Data

The data shown in figures should satisfy the following conditions:

- the data were obtained and processed according to the field's best practice and are presented to reflect the results of the experiments in an accurate and unbiased manner.
- ideally, figure panels should include only measurements that are directly comparable to each other and obtained with the same assay.
- plots include clearly labeled error bars for independent experiments and sample sizes. Unless justified, error bars should not be shown for technical replicates.
- if  $n < 5$ , the individual data points from each experiment should be plotted. Any statistical test employed should be justified.
- Source Data should be included to report the data underlying figures according to the guidelines set out in the authorship guidelines on Data

#### 2. Captions

Each figure caption should contain the following information, for each panel where they are relevant:

- a specification of the experimental system investigated (eg cell line, species name).
- the assay(s) and method(s) used to carry out the reported observations and measurements.
- an explicit mention of the biological and chemical entity(ies) that are being measured.
- an explicit mention of the biological and chemical entity(ies) that are altered/ varied/ perturbed in a controlled manner.
- the exact sample size (n) for each experimental group/condition, given as a number, not a range;
- a description of the sample collection allowing the reader to understand whether the samples represent technical or biological replicates (including how many animals, litters, cultures, etc.).
- a statement of how many times the experiment shown was independently replicated in the laboratory.
- definitions of statistical methods and measures:
  - common tests, such as t-test (please specify whether paired vs. unpaired), simple  $\chi^2$  tests, Wilcoxon and Mann-Whitney tests, can be unambiguously identified by name only, but more complex techniques should be described in the methods section;
  - are tests one-sided or two-sided?
  - are there adjustments for multiple comparisons?
  - exact statistical test results, e.g., P values = x but not P values < x;
  - definition of 'center values' as median or average;
  - definition of error bars as s.d. or s.e.m.

Please complete ALL of the questions below.  
Select "Not Applicable" only when the requested information is not relevant for your study.

### Materials

| Material Category                                                                                                                                                                                                                                                                                                                                                                                                      | Information included in the manuscript? | In which section is the information available?<br>(Reagents and Tools Table, Materials and Methods, Figures, Data Availability Section) |
|------------------------------------------------------------------------------------------------------------------------------------------------------------------------------------------------------------------------------------------------------------------------------------------------------------------------------------------------------------------------------------------------------------------------|-----------------------------------------|-----------------------------------------------------------------------------------------------------------------------------------------|
| <b>Newly Created Materials</b><br>New materials and reagents need to be available; do any restrictions apply?                                                                                                                                                                                                                                                                                                          | Not Applicable                          |                                                                                                                                         |
| <b>Antibodies</b><br>For <b>antibodies</b> provide the following information:<br>- Commercial antibodies: RRID (if possible) or supplier name, catalogue number and or/clone number<br>- Non-commercial: RRID or citation                                                                                                                                                                                              | Not Applicable                          |                                                                                                                                         |
| <b>DNA and RNA sequences</b><br>Short novel DNA or RNA including primers, probes: provide the sequences.                                                                                                                                                                                                                                                                                                               | Not Applicable                          |                                                                                                                                         |
| <b>Cell materials</b><br><b>Cell lines:</b> Provide species information, strain. Provide accession number in repository OR supplier name, catalog number, clone number, and/OR RRID.<br><b>Primary cultures:</b> Provide species, strain, sex of origin, genetic modification status.<br>Report if the cell lines were recently <b>authenticated</b> (e.g., by STR profiling) and tested for mycoplasma contamination. | Yes                                     | Materials and Methods                                                                                                                   |
| <b>Experimental animals</b><br><b>Laboratory animals or Model organisms:</b> Provide species, strain, sex, age, genetic modification status. Provide accession number in repository OR supplier name, catalog number, clone number, OR RRID.<br><b>Animal observed in or captured from the field:</b> Provide species, sex, and age where possible.<br>Please detail <b>housing and husbandry conditions</b> .         | Not Applicable                          |                                                                                                                                         |
| <b>Plants and microbes</b><br><b>Plants:</b> provide species and strain, ecotype and cultivar where relevant, unique accession number if available, and source (including location for collected wild specimens).<br><b>Microbes:</b> provide species and strain, unique accession number if available, and source.                                                                                                    | Not Applicable                          |                                                                                                                                         |
| <b>Human research participants</b><br>If collected and within the bounds of privacy constraints report on age, sex and gender or ethnicity for all study participants.                                                                                                                                                                                                                                                 | Not Applicable                          |                                                                                                                                         |
| <b>Core facilities</b><br>If your work benefited from core facilities, was their service mentioned in the acknowledgments section?                                                                                                                                                                                                                                                                                     | Yes                                     | Acknowledgement                                                                                                                         |

### Design

| <b>Study protocol</b>                                                                                                                                                                                                                                                                                                                      | <b>Information included in the manuscript?</b> | <b>In which section is the information available?</b><br>(Reagents and Tools Table, Materials and Methods, Figures, Data Availability Section) |
|--------------------------------------------------------------------------------------------------------------------------------------------------------------------------------------------------------------------------------------------------------------------------------------------------------------------------------------------|------------------------------------------------|------------------------------------------------------------------------------------------------------------------------------------------------|
| If study protocol has been <b>pre-registered</b> , provide DOI in the <b>manuscript</b> . For clinical trials, provide the trial registration number <b>OR</b> cite DOI.                                                                                                                                                                   | Not Applicable                                 |                                                                                                                                                |
| Report the <b>clinical trial registration number</b> (at ClinicalTrials.gov or equivalent), where applicable.                                                                                                                                                                                                                              | Not Applicable                                 |                                                                                                                                                |
| <b>Laboratory protocol</b>                                                                                                                                                                                                                                                                                                                 | <b>Information included in the manuscript?</b> | <b>In which section is the information available?</b><br>(Reagents and Tools Table, Materials and Methods, Figures, Data Availability Section) |
| Provide DOI OR other citation details if <b>external detailed step-by-step protocols</b> are available.                                                                                                                                                                                                                                    | Not Applicable                                 |                                                                                                                                                |
| <b>Experimental study design and statistics</b>                                                                                                                                                                                                                                                                                            | <b>Information included in the manuscript?</b> | <b>In which section is the information available?</b><br>(Reagents and Tools Table, Materials and Methods, Figures, Data Availability Section) |
| Include a statement about <b>sample size</b> estimate even if no statistical methods were used.                                                                                                                                                                                                                                            | Not Applicable                                 |                                                                                                                                                |
| Were any steps taken to minimize the effects of subjective bias when allocating animals/samples to treatment (e.g. <b>randomization procedure</b> )? If yes, have they been described?                                                                                                                                                     | Not Applicable                                 |                                                                                                                                                |
| Include a statement about <b>blinding</b> even if no blinding was done.                                                                                                                                                                                                                                                                    | Not Applicable                                 |                                                                                                                                                |
| Describe <b>inclusion/exclusion criteria</b> if samples or animals were excluded from the analysis. Were the criteria pre-established?                                                                                                                                                                                                     | Not Applicable                                 |                                                                                                                                                |
| If sample or data points were omitted from analysis, report if this was due to attrition or intentional exclusion and provide justification.                                                                                                                                                                                               | Not Applicable                                 |                                                                                                                                                |
| For every figure, are <b>statistical tests</b> justified as appropriate? Do the data meet the assumptions of the tests (e.g., normal distribution)? Describe any methods used to assess it. Is there an estimate of variation within each group of data? Is the variance similar between the groups that are being statistically compared? | Not Applicable                                 |                                                                                                                                                |
| <b>Sample definition and in-laboratory replication</b>                                                                                                                                                                                                                                                                                     | <b>Information included in the manuscript?</b> | <b>In which section is the information available?</b><br>(Reagents and Tools Table, Materials and Methods, Figures, Data Availability Section) |
| In the figure legends: state number of times the experiment was <b>replicated</b> in laboratory.                                                                                                                                                                                                                                           | Yes                                            | Figure legends                                                                                                                                 |
| In the figure legends: define whether data describe <b>technical or biological replicates</b> .                                                                                                                                                                                                                                            | Yes                                            | Figures legends                                                                                                                                |

#### Ethics

| <b>Ethics</b>                                                                                                                                                                                                                                                                                            | <b>Information included in the manuscript?</b> | <b>In which section is the information available?</b><br>(Reagents and Tools Table, Materials and Methods, Figures, Data Availability Section) |
|----------------------------------------------------------------------------------------------------------------------------------------------------------------------------------------------------------------------------------------------------------------------------------------------------------|------------------------------------------------|------------------------------------------------------------------------------------------------------------------------------------------------|
| Studies involving <b>human participants</b> : State details of <b>authority granting ethics approval</b> (IRB or equivalent committee(s), provide reference number for approval).                                                                                                                        | Not Applicable                                 |                                                                                                                                                |
| Studies involving <b>human participants</b> : Include a statement confirming that <b>informed consent</b> was obtained from all subjects and that the experiments conformed to the principles set out in the WMA Declaration of Helsinki and the Department of Health and Human Services Belmont Report. | Not Applicable                                 |                                                                                                                                                |
| Studies involving <b>human participants</b> : For publication of <b>patient photos</b> , include a statement confirming that consent to publish was obtained.                                                                                                                                            | Not Applicable                                 |                                                                                                                                                |
| Studies involving experimental <b>animals</b> : State details of <b>authority granting ethics approval</b> (IRB or equivalent committee(s), provide reference number for approval. Include a statement of compliance with ethical regulations.                                                           | Not Applicable                                 |                                                                                                                                                |
| Studies involving <b>specimen and field samples</b> : State if relevant <b>permits</b> obtained, provide details of authority approving study; if none were required, explain why.                                                                                                                       | Not Applicable                                 |                                                                                                                                                |
| <b>Dual Use Research of Concern (DURC)</b>                                                                                                                                                                                                                                                               | <b>Information included in the manuscript?</b> | <b>In which section is the information available?</b><br>(Reagents and Tools Table, Materials and Methods, Figures, Data Availability Section) |
| Could your study fall under dual use research restrictions? Please check biosecurity documents and list of <b>select agents and toxins</b> (CDC): <a href="https://www.selectagents.gov/sat/list.htm">https://www.selectagents.gov/sat/list.htm</a> .                                                    | Not Applicable                                 |                                                                                                                                                |
| If you used a select agent, is the security level of the lab appropriate and reported in the manuscript?                                                                                                                                                                                                 | Not Applicable                                 |                                                                                                                                                |
| If a study is subject to dual use research of concern regulations, is the name of the <b>authority granting approval and reference number</b> for the regulatory approval provided in the manuscript?                                                                                                    | Not Applicable                                 |                                                                                                                                                |

#### Reporting

The MDAR framework recommends adoption of discipline-specific guidelines, established and endorsed through community initiatives. Journals have their own policy about requiring specific guidelines and recommendations to complement MDAR.

| <b>Adherence to community standards</b>                                                                                                                                                                                                                                                                                              | <b>Information included in the manuscript?</b> | <b>In which section is the information available?</b><br>(Reagents and Tools Table, Materials and Methods, Figures, Data Availability Section) |
|--------------------------------------------------------------------------------------------------------------------------------------------------------------------------------------------------------------------------------------------------------------------------------------------------------------------------------------|------------------------------------------------|------------------------------------------------------------------------------------------------------------------------------------------------|
| State if relevant guidelines or checklists (e.g., ICMJE, MIBBI, ARRIVE, PRISMA) have been followed or provided.                                                                                                                                                                                                                      | Not Applicable                                 |                                                                                                                                                |
| For <b>tumor marker prognostic studies</b> , we recommend that you follow the <b>REMARK</b> reporting guidelines (see link list at top right). See author guidelines, under 'Reporting Guidelines'. Please confirm you have followed these guidelines.                                                                               | Not Applicable                                 |                                                                                                                                                |
| For <b>phase II and III randomized controlled trials</b> , please refer to the <b>CONSORT</b> flow diagram (see link list at top right) and submit the <b>CONSORT</b> checklist (see link list at top right) with your submission. See author guidelines, under 'Reporting Guidelines'. Please confirm you have submitted this list. | Not Applicable                                 |                                                                                                                                                |

#### Data Availability

| <b>Data availability</b>                                                                                                                                                                          | <b>Information included in the manuscript?</b> | <b>In which section is the information available?</b><br>(Reagents and Tools Table, Materials and Methods, Figures, Data Availability Section) |
|---------------------------------------------------------------------------------------------------------------------------------------------------------------------------------------------------|------------------------------------------------|------------------------------------------------------------------------------------------------------------------------------------------------|
| Have <b>primary datasets</b> been deposited according to the journal's guidelines (see 'Data Deposition' section) and the respective accession numbers provided in the Data Availability Section? | Yes                                            | Data availability                                                                                                                              |
| Were <b>human clinical and genomic datasets</b> deposited in a public access-controlled repository in accordance to ethical obligations to the patients and to the applicable consent agreement?  | Not Applicable                                 |                                                                                                                                                |
| Are <b>computational models</b> that are central and integral to a study available without restrictions in a machine-readable form? Were the relevant accession numbers or links provided?        | Not Applicable                                 |                                                                                                                                                |
| If publicly available data were reused, provide the respective <b>data citations in the reference list</b> .                                                                                      | Not Applicable                                 |                                                                                                                                                |
