# Supplementary material
Source: PubMed Central journal article supplement (PMC10711658)
Supplement: EMBJ-42-e114889-s008.pdf [file EMBJ-42-e114889-s008.pdf]

## Appendix Figures and Tables

For the manuscript

### **Structure and mechanism of a eukaryotic ceramide synthase complex**

Tian Xie, Qi Fang, Zike Zhang, Yanfei Wang, Feitong Dong, and Xin Gong\*

\*To whom correspondence should be addressed: X.G. (gongx@sustech.edu.cn).

#### **Table of contents**

| <b>Contents</b>                                                                                 | <b>Page</b> |
|-------------------------------------------------------------------------------------------------|-------------|
| <b>Appendix Figure S1</b>   Cryo-EM analysis of the C26-CoA-bound Lac1-Lip1 complex.            | 2           |
| <b>Appendix Figure S2</b>   Representative density maps of the C26-CoA-bound Lac1-Lip1 complex. | 3           |
| <b>Appendix Figure S3</b>   Purification of C26-CoA binding mutants.                            | 4           |
| <b>Appendix Figure S4</b>   Characterization of Lac1-Lip1 mutants.                              | 5           |
| <b>Appendix Figure S5</b>   Cryo-EM analysis of the Lac1-Lip1 <sup>S74F</sup> complex.          | 6           |
| <b>Appendix Figure S6</b>   Lac1-mediated oligomerization of the Lac1-Lip1 complex.             | 7           |
| <b>Appendix Table S1</b>   Cryo-EM data collection, refinement, and validation statistics.      | 8           |

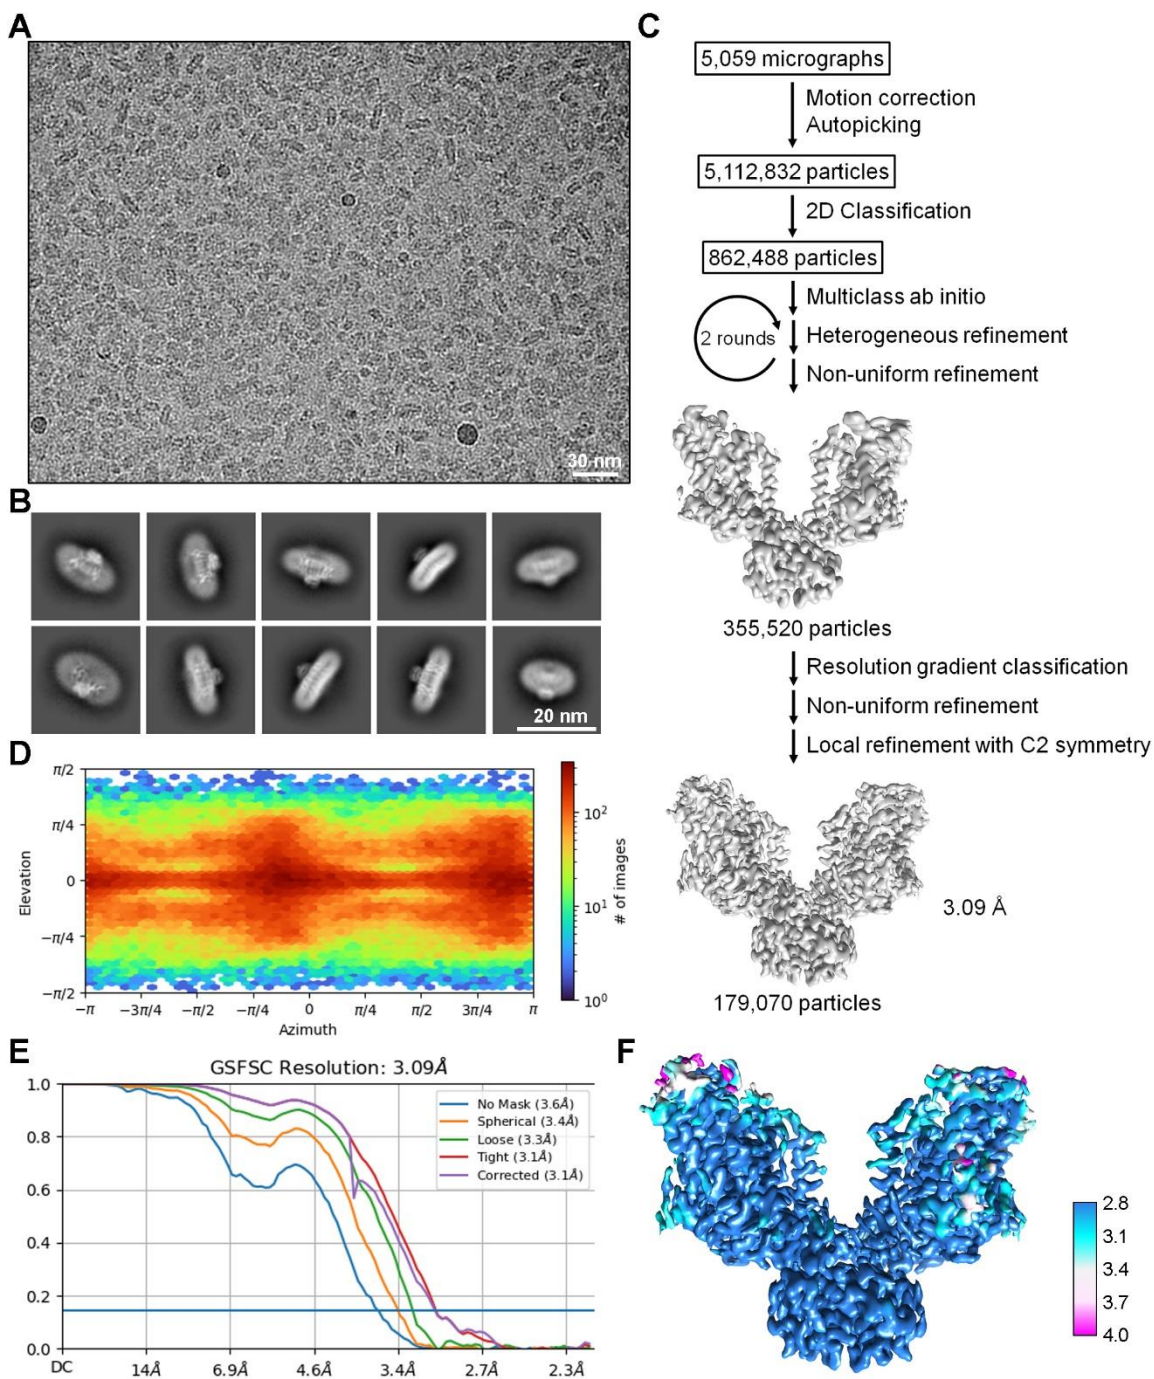

**Appendix Figure S1 | Cryo-EM analysis of the C26-CoA-bound Lac1-Lip1 complex.** **A**, Representative cryo-EM micrograph. **B**, Representative 2D class averages. **C**, Flowchart for cryo-EM data processing. **D-F**, Euler angle distribution, gold-standard FSC curves, and local resolution map of the C26-CoA-bound Lac1-Lip1 complex.

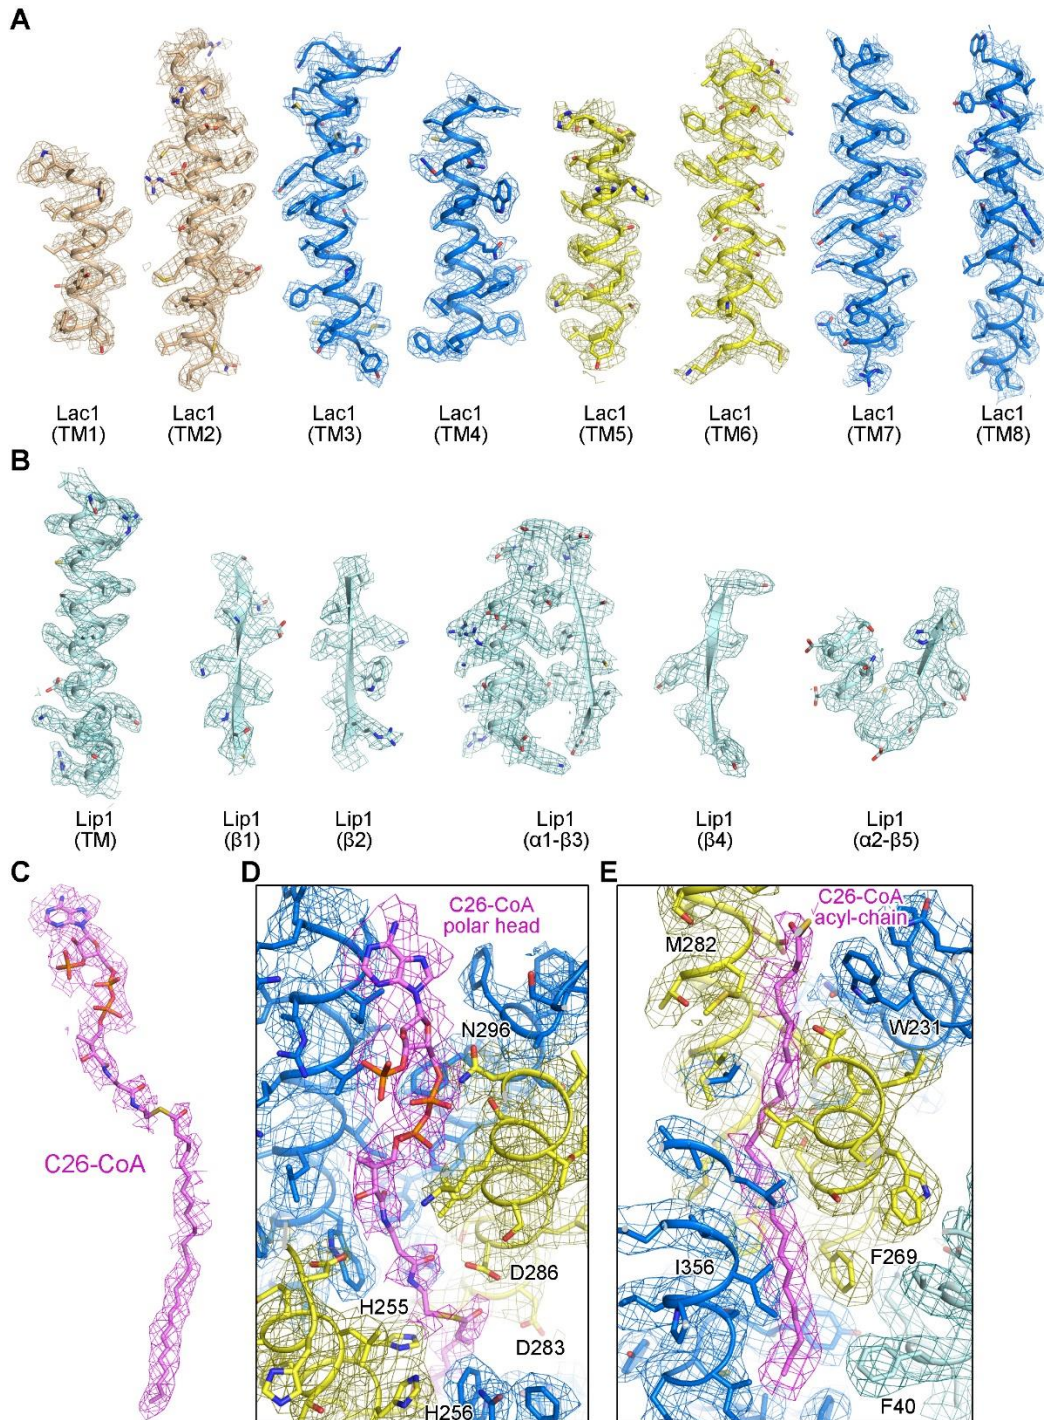

**Appendix Figure S2 | Representative density maps of the C26-CoA-bound Lac1-Lip1 complex.**

**A-B**, EM density maps of the representative secondary structural elements from Lac1 (**A**) and Lip1 (**B**).

**C**, Density map for C26-CoA. **D-E**, Close-up views of the density map for C26-CoA-binding sites.

The density maps for C26-CoA were contoured at  $3\sigma$ . All the other density maps were contoured at  $5\sigma$ .

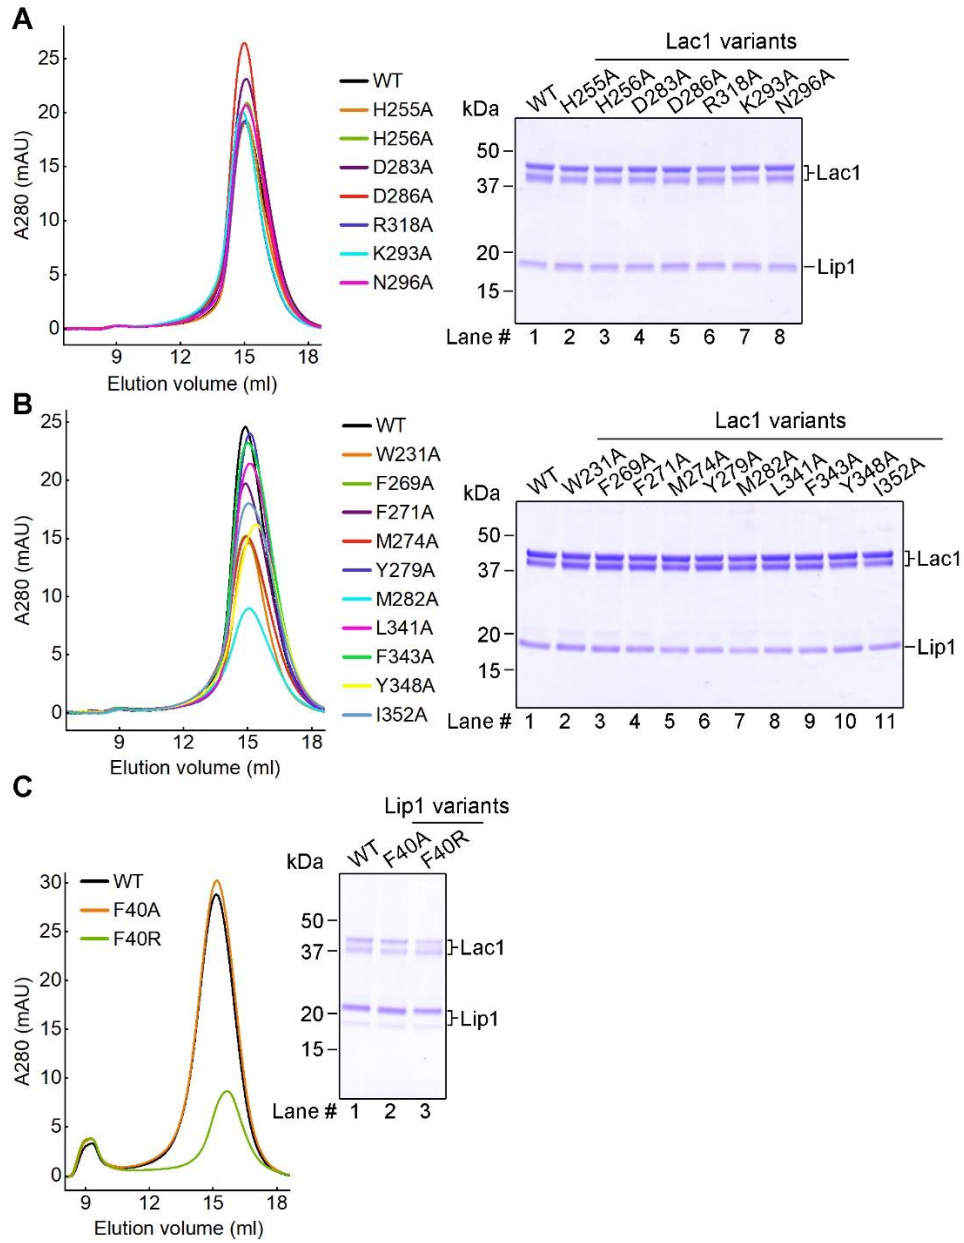

**Appendix Figure S3 | Purification of C26-CoA binding mutants.** SEC profiles and Coomassie blue-stained SDS-PAGE gels for the Lac1 hydrophilic cavity mutants (**A**), the Lac1 acyl-chain binding site mutants (**B**), and the Lip1 acyl-chain binding site mutants (**C**). Similar amounts of purified proteins were subjected to SDS-PAGE gels for analysis.

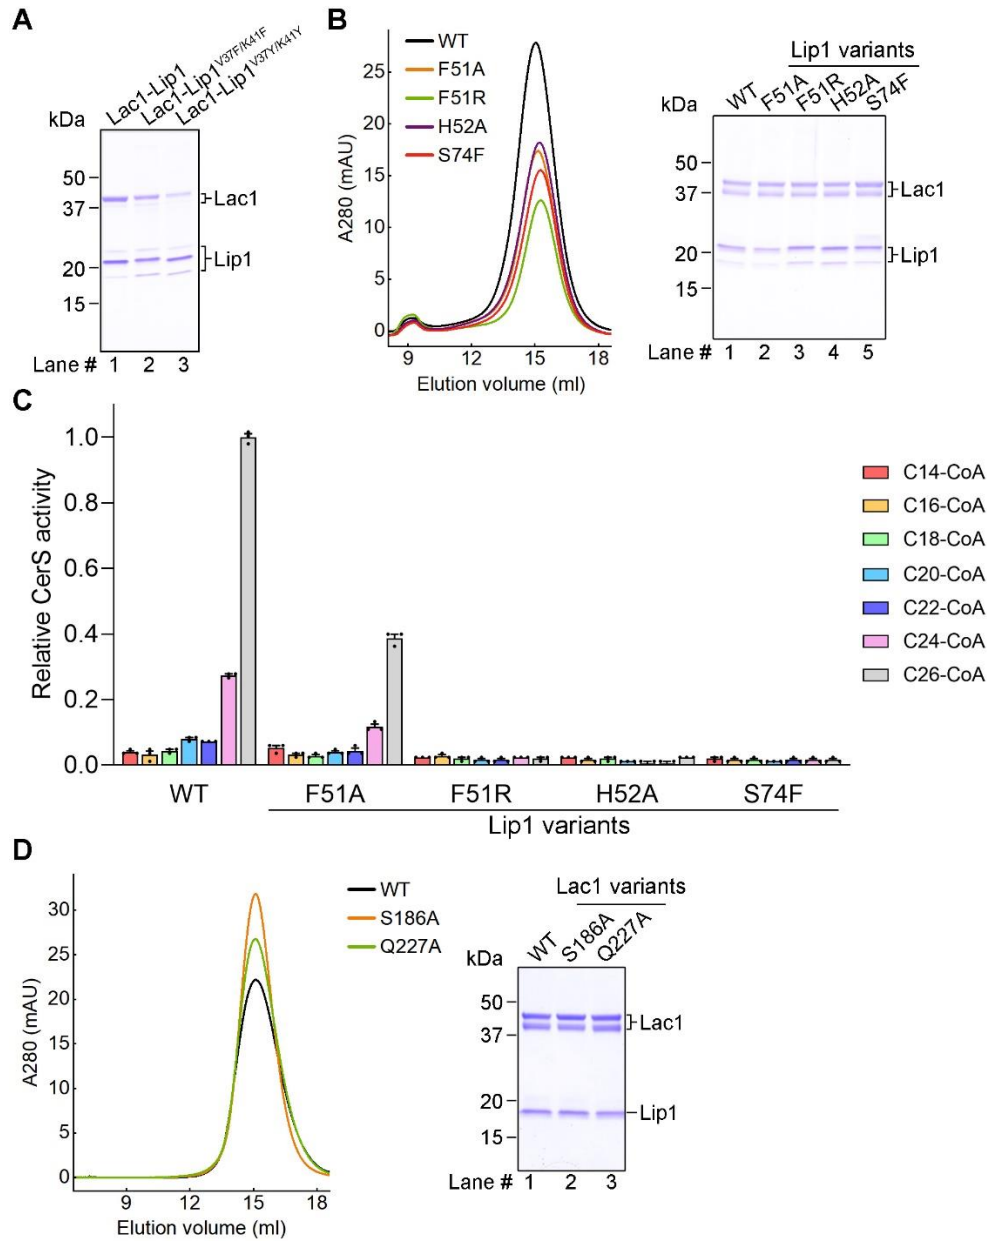

**Appendix Figure S4 | Characterization of Lac1-Lip1 mutants.** **A**, The Lip1 TM interaction interface mutants partially impaired the complex formation between Lac1 and Lip1. **B**, SEC profiles and Coomassie blue-stained SDS-PAGE gel for the Lip1 luminal interaction interface mutants. **C**, Acyl-chain selectivity of the Lip1 luminal interaction interface mutants revealed by CerS activity. Each data point is the average  $\pm$  SEM of three independent experiments. **D**, SEC profiles and Coomassie blue-stained SDS-PAGE gel for the Lac1 lateral-opening mutants. Similar amounts of purified proteins were subjected to SDS-PAGE gels for analysis in panels **(B)** and **(D)**.

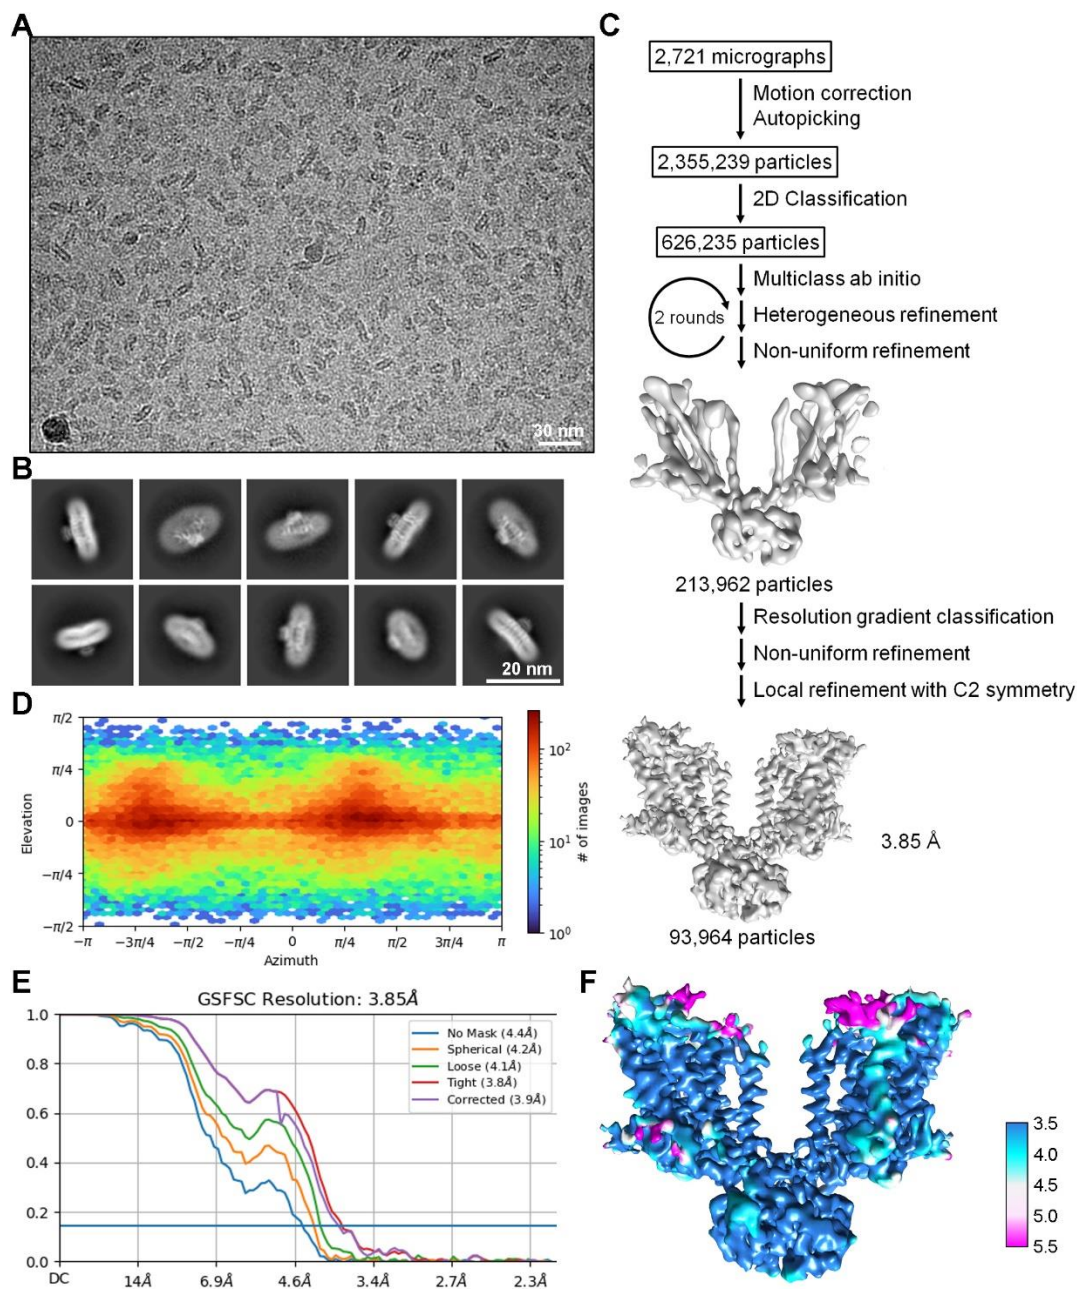

**Appendix Figure S5 | Cryo-EM analysis of the LacI-Lip1<sup>S74F</sup> complex.** **A**, Representative cryo-EM micrograph. **B**, Representative 2D class averages. **C**, Flowchart for cryo-EM data processing. **D-F**, Euler angle distribution, gold-standard FSC curves, and local resolution map of the LacI-Lip1<sup>S74F</sup> complex.

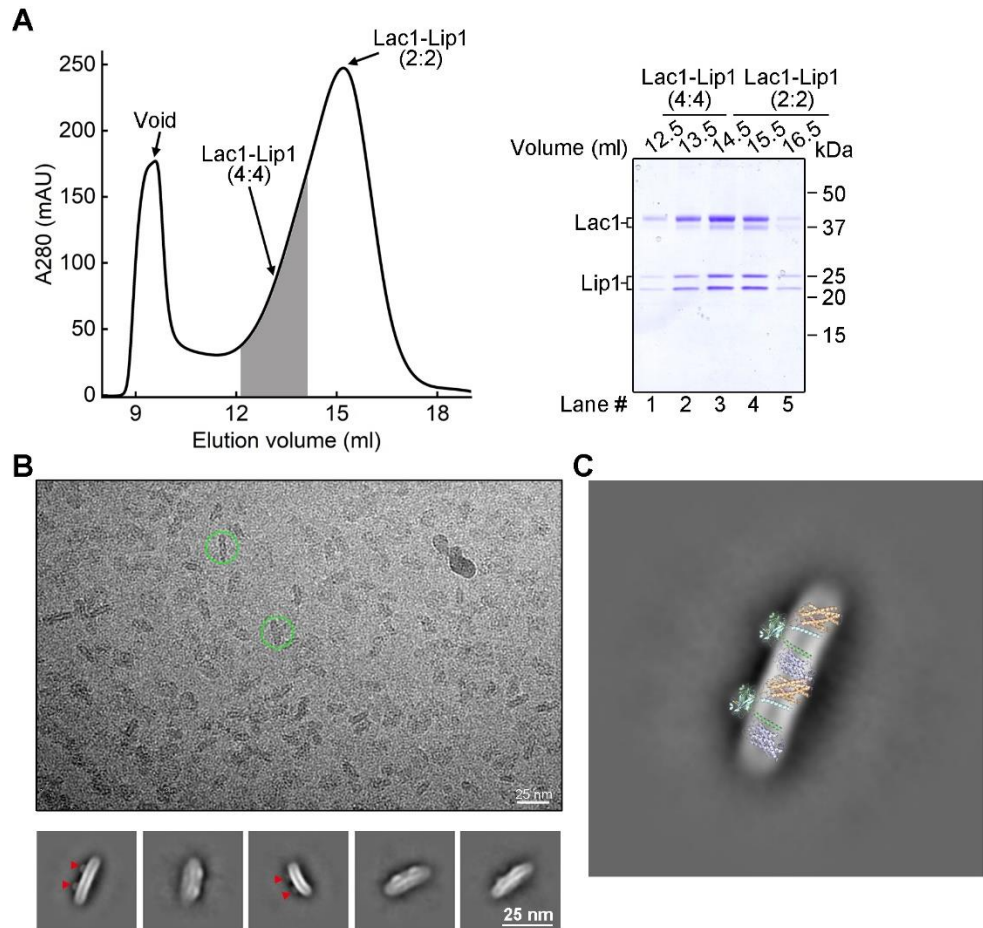

**Appendix Figure S6 | Lac1-mediated oligomerization of the Lac1-Lip1 complex.** **A**, SEC profile of a representative large-scale Lac1-Lip1 complex preparation. The major peak indicates the Lac1-Lip1 (2:2) complex as verified by cryo-EM analysis in Appendix Figure S1. Protein in the shoulder area before the Lac1-Lip1 (2:2) peak was collected for cryo-EM study and verified as Lac1-Lip1 (4:4) complex. **B**, Representative cryo-EM micrograph and 2D averages of the protein sample from the shoulder area. The typical Lac1-Lip1 (4:4) complex particles are indicated by green circles. The two Lip1 dimers are marked with red arrowheads. **C**, The representative 2D class average of the protein sample from the shoulder area can match well with the structures of two 2:2 Lac1-Lip1 complexes, revealing a potential Lac1-mediated oligomerization interface.

**Appendix Table S1 | Cryo-EM data collection, refinement, and validation statistics.**

|                                                     | C26-CoA-bound Lac1-Lip1 complex (EMD-35862, PDB 8IZD) | Lac1-Lip1 <sup>S74F</sup> complex (EMD-35863, PDB 8IZF) |
|-----------------------------------------------------|-------------------------------------------------------|---------------------------------------------------------|
| <b>Data collection and processing</b>               |                                                       |                                                         |
| Magnification                                       | 81,000                                                | 81,000                                                  |
| Voltage (kV)                                        | 300                                                   | 300                                                     |
| Electron exposure (e <sup>-</sup> /Å <sup>2</sup> ) | 50                                                    | 50                                                      |
| Defocus range (µm)                                  | -2.0 to -1.0                                          | -2.0 to -1.0                                            |
| Pixel size (Å)                                      | 1.072                                                 | 1.072                                                   |
| Symmetry imposed                                    | C2                                                    | C2                                                      |
| Initial particle images (no.)                       | 5,112,832                                             | 2,355,239                                               |
| Final particle images (no.)                         | 179,070                                               | 93,964                                                  |
| Map resolution (Å)                                  | 3.09 Å                                                | 3.85 Å                                                  |
| FSC threshold                                       | 0.143                                                 | 0.143                                                   |
| Map resolution range (Å)                            | 2.8-4.0 Å                                             | 3.5-5.5 Å                                               |
| <b>Refinement</b>                                   |                                                       |                                                         |
| Initial model used (PDB code)                       | None                                                  | None                                                    |
| Model resolution (Å)                                | 3.1 Å                                                 | 3.9 Å                                                   |
| FSC threshold                                       | 0.143                                                 | 0.143                                                   |
| Model resolution range (Å)                          |                                                       |                                                         |
| Map sharpening <i>B</i> factor (Å <sup>2</sup> )    | -117.8                                                | -162.5                                                  |
| Model composition                                   |                                                       |                                                         |
| Nonhydrogen atoms                                   | 7,782                                                 | 7,594                                                   |
| Protein residues                                    | 894                                                   | 894                                                     |
| Ligands                                             | 8                                                     | 2                                                       |
| <i>B</i> factors (Å <sup>2</sup> )                  |                                                       |                                                         |
| Protein                                             | 52.04                                                 | 76.45                                                   |
| Ligand                                              | 52.21                                                 | 69.24                                                   |
| R.m.s. deviations                                   |                                                       |                                                         |
| Bond lengths (Å)                                    | 0.005                                                 | 0.005                                                   |
| Bond angles (°)                                     | 1.224                                                 | 0.891                                                   |
| <b>Validation</b>                                   |                                                       |                                                         |
| MolProbity score                                    | 2.02                                                  | 2.23                                                    |
| Clashscore                                          | 11.29                                                 | 15.54                                                   |
| Poor rotamers (%)                                   | 0.00                                                  | 0.00                                                    |
| Ramachandran plot                                   |                                                       |                                                         |
| Favored (%)                                         | 93.00                                                 | 90.52                                                   |
| Allowed (%)                                         | 7.00                                                  | 9.03                                                    |
| Disallowed (%)                                      | 0.00                                                  | 0.45                                                    |
